# Supplementary material
Source: Royal Society of Chemistry journal article supplement (doi:10.1039/d6an00128a)

## Pre-treatment

## Post-treatment

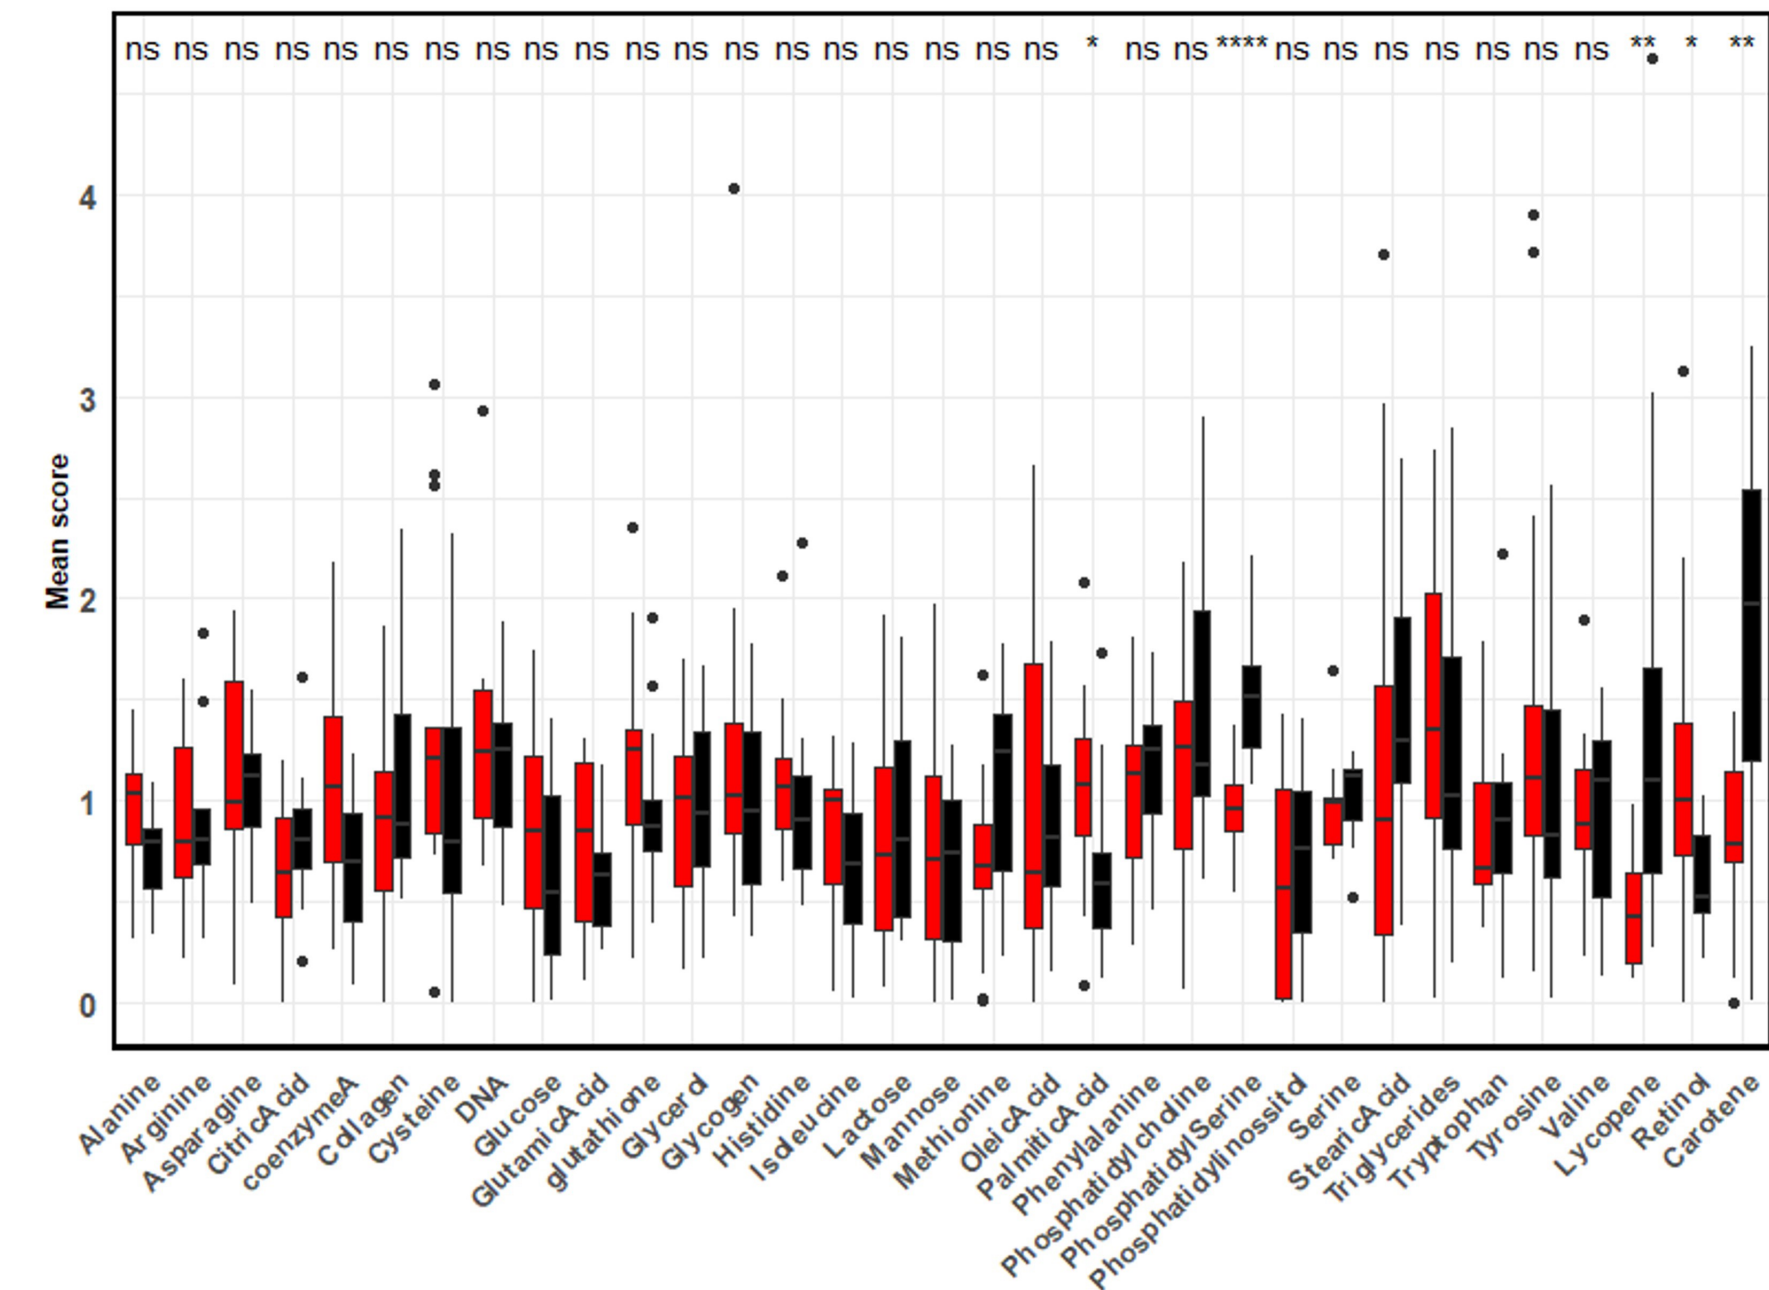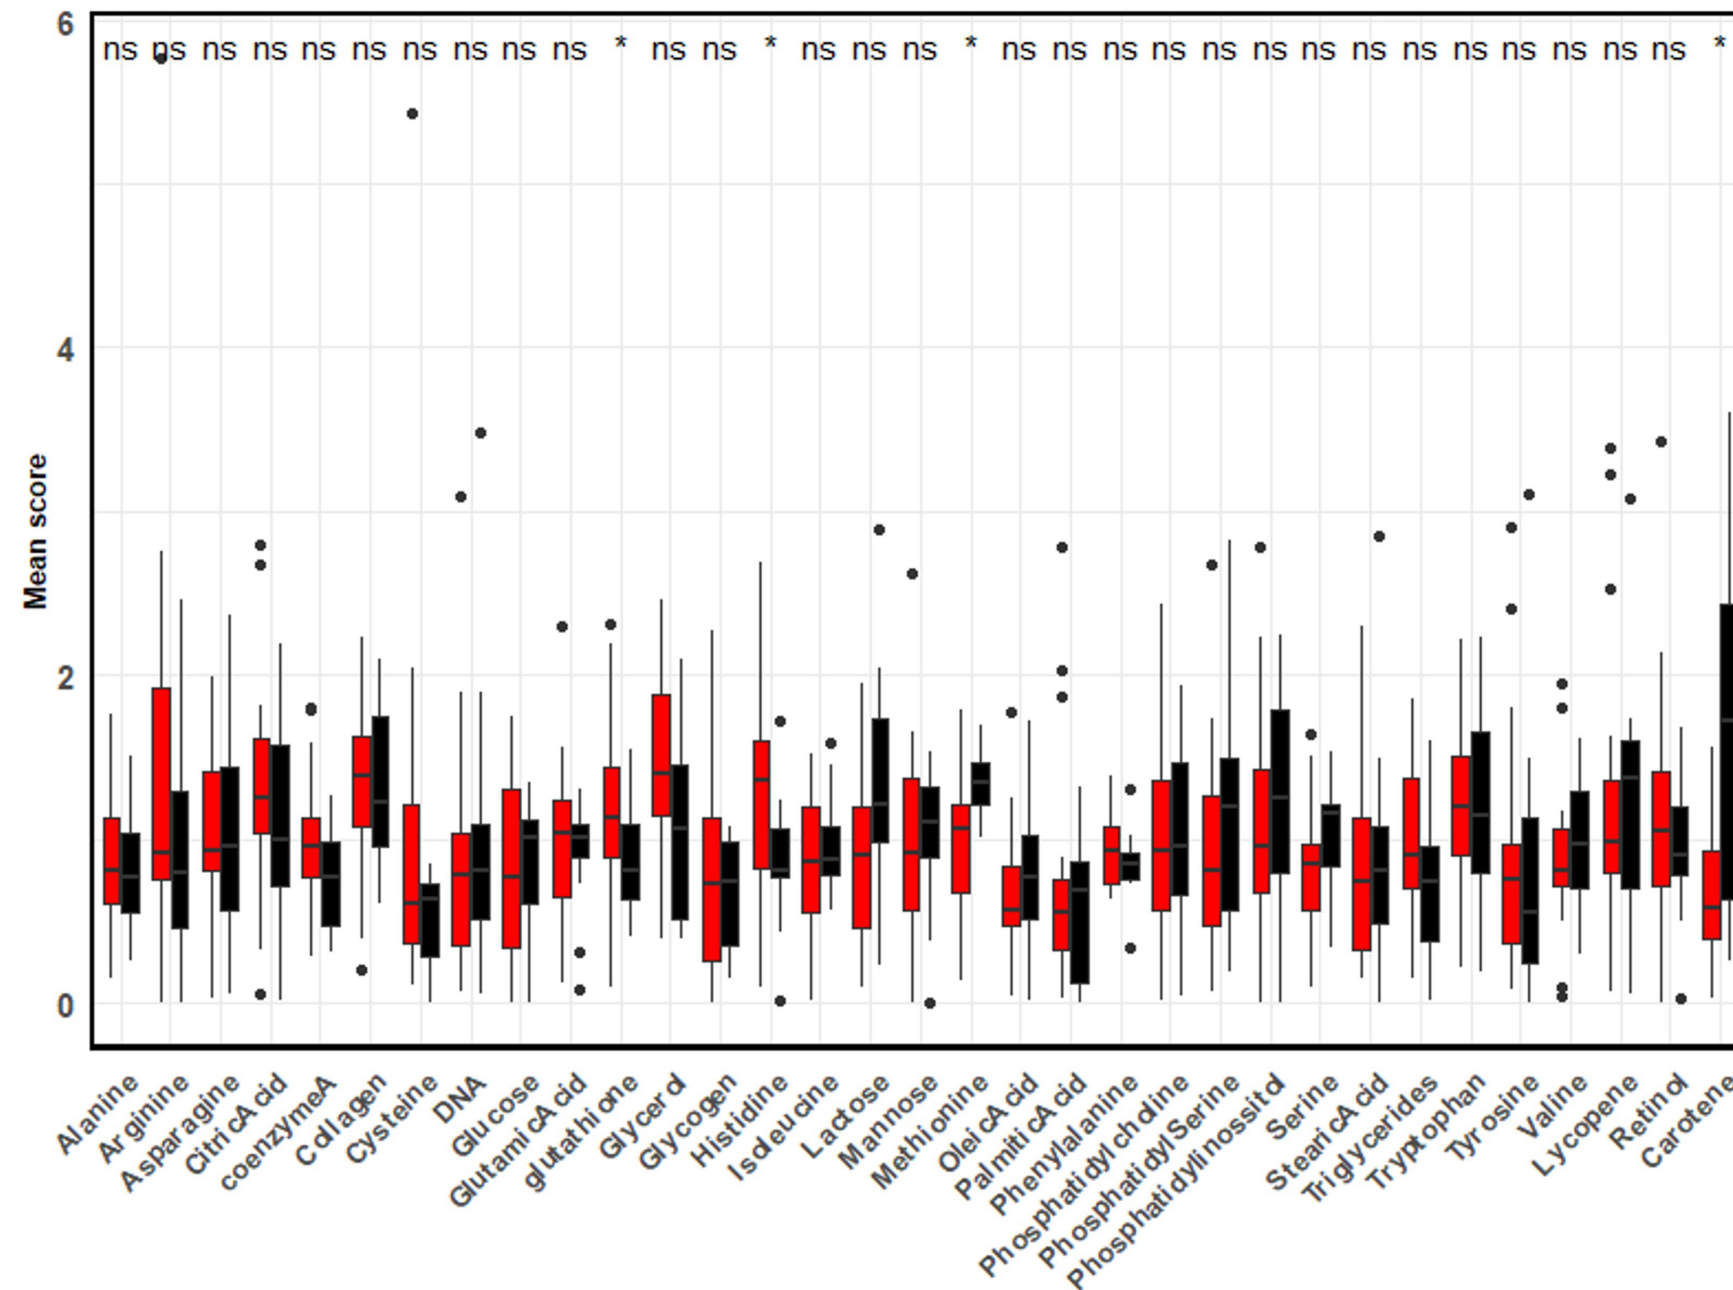

Supplement: d6an00128a2.pdf [file d6an00128a2.pdf]
